# Supplementary material for: ITRAQ-Based Quantitative Proteomics Reveals the Proteome Profiles of Primary Duck Embryo Fibroblast Cells Infected with Duck Tembusu Virus
Source: Hindawi journal article supplement (doi:10.1155/2019/1582709), 2019-01-27
Supplement: f1 [file 1582709.f1.pdf]

SI TABLE 1: List of significant and differentially expressed proteins identified in DEFs infected with DTMUV<sup>a</sup>

| Accession | Name                                            | Protein<br>Length | %Cov<br>(95) | Fold change in expression / p-value |                |                |
|-----------|-------------------------------------------------|-------------------|--------------|-------------------------------------|----------------|----------------|
|           |                                                 |                   |              | 12 hpi                              | 24 hpi         | 42 hpi         |
| U3J5Y3    | Spectrin alpha,<br>non-erythrocytic 1           | 2477              | 53.25        | 0.759/0.1499                        | 0.597/3.19E-08 | 0.192/0        |
| R0KBE2    | Fatty acid synthase                             | 2513              | 52.69        | 0.614/0.143                         | 0.603/7.22E-08 | 0.530/2.89E-08 |
| R0LN18    | Spectrin beta chain, brain 1                    | 2364              | 51.95        | 0.912/0.057                         | 1.236/0.886    | 0.244/0        |
| R0JC10    | Collagen alpha-1(XII) chain                     | 3085              | 40.23        | 0.759/0.361                         | 0.492/3.01E-07 | 2.377/1.43E-09 |
| U3IJ39    | AHNAK nucleoprotein                             | 5537              | 56.75        | 0.511/6.08E-11                      | 0.570/8.10E-14 | 0.073/0        |
| U3ID88    | Collagen type VI alpha 3<br>chain               | 3136              | 36.70        | 0.904/0.819                         | 0.955/0.321    | 2.109/4.00E-13 |
| U3IIB9    | Myosin heavy chain 9                            | 1907              | 50.03        | 0.879/0.133                         | 1.499/0.549    | 1.706/2.54E-06 |
| R0LH70    | Fibronectin                                     | 2431              | 44.34        | 1.486/0.0001                        | 0.879/0.403    | 2.655/2.53E-12 |
| U3IN65    | Plectin                                         | 4196              | 22.71        | 0.973/0.772                         | 1.236/0.142    | 0.263/0        |
| U3I6C2    | Glutamyl-prolyl-tRNA<br>synthetase              | 1607              | 49.47        | 0.614/0.001                         | 1.028/0.177    | 0.492/7.34E-07 |
| U3ISA8    | Pre-mRNA processing factor<br>8                 | 2248              | 30.92        | 1.096/0.764                         | 1.202/0.904    | 2.051/0.0002   |
| U3J4X1    | Heat shock protein 90 beta<br>family member 1   | 771               | 62.13        | 0.421/0.006                         | 1.722/0.161    | 2.858/1.07E-12 |
| U3ISP9    | Eukaryotic translation<br>elongation factor 2   | 826               | 60.41        | 0.511/0.0002                        | 1.096/0.047    | 0.398/1.07E-05 |
| R0JSM9    | Heat shock protein HSP<br>90-alpha              | 732               | 54.51        | 0.305/2.77E-08                      | 0.839/0.162    | 0.5755/0.004   |
| U3J925    | ATP-citrate synthase                            | 1101              | 51.59        | 0.461/0.007                         | 1.236/0.716    | 0.525/7.91E-07 |
| R0L1Y3    | 60 kDa heat shock protein,<br>mitochondrial     | 573               | 79.23        | 0.581/0.001                         | 1.028/0.416    | 1.837/0.0001   |
| U3IW58    | Collagen type I alpha 2 chain                   | 1363              | 62.36        | 1.086/0.588                         | 0.555/0.003    | 0.283/0.0004   |
| U3I992    | Talin 2                                         | 2544              | 29.44        | 1.107/0.767                         | 1.393/0.599    | 0.350/0.002    |
| U3IR26    | Vinculin                                        | 1082              | 49.45        | 1.019/0.506                         | 0.738/0.094    | 0.316/1.98E-05 |
| U3I6R1    | Annexin                                         | 658               | 51.22        | 0.316/0.011                         | 0.643/0.0003   | 0.698/0.041    |
| R0L244    | Supervillin                                     | 2206              | 27.61        | 0.973/0.926                         | 0.904/0.118    | 0.240/6.70E-07 |
| U3IX93    | High density lipoprotein<br>binding protein     | 1267              | 44.36        | 0.631/0.015                         | 0.946/0.320    | 0.340/1.28E-05 |
| R0L527    | Filamin-B                                       | 1099              | 60.42        | 0.731/0.029                         | 0.887/0.299    | 0.597/0.004    |
| R0L4K0    | Heat shock cognate 71 kDa<br>protein            | 647               | 57.03        | 0.488/0.0002                        | 1.445/0.893    | 0.570/0.006    |
| R0JMK8    | Aminopeptidase                                  | 835               | 47.43        | 0.724/0.012                         | 0.929/0.194    | 0.515/0.0003   |
| U3IUB7    | Lamin B2                                        | 549               | 59.56        | 0.705/0.003                         | 1.528/0.280    | 0.209/8.53E-08 |
| U3IFD3    | Myosin heavy chain 11                           | 1979              | 34.77        | 0.847/0.026                         | 1.180/0.399    | 1.820/8.45E-05 |
| U3I640    | Heat shock protein family A<br>(Hsp70) member 5 | 612               | 57.84        | 0.679/0.0004                        | 1.905/0.053    | 2.377/4.21E-09 |
| U3IR52    | Alpha-enolase                                   | 434               | 82.03        | 0.377/0.002                         | 1.096/0.241    | 0.247/3.30E-12 |
| U3I0F9    | Pyruvate kinase                                 | 539               | 70.69        | 0.535/0.024                         | 0.938/0.040    | 0.370/4.34E-05 |

SI TABLE 1: continued

| Accession | Name                                                                                       | Protein<br>Length | %Cov<br>(95) | Fold change in expression / p-value |              |                |
|-----------|--------------------------------------------------------------------------------------------|-------------------|--------------|-------------------------------------|--------------|----------------|
|           |                                                                                            |                   |              | 12 hpi                              | 24 hpi       | 42 hpi         |
| R0M765    | Elongation factor 1-alpha                                                                  | 462               | 74.68        | 0.118/2.88E-05                      | 0.718/0.188  | 1.486/0.029    |
| U3J5N5    | Prolyl endopeptidase                                                                       | 717               | 50.91        | 0.879/0.560                         | 0.824/0.034  | 0.661/0.025    |
| Q7ZYV1    | Sodium/potassium-transporting<br>ATPase subunit alpha                                      | 1023              | 35.97        | 0.520/0.030                         | 1.318/0.707  | 1.191/0.343    |
| U3J3Z2    | Chaperonin containing TCP1<br>subunit 7                                                    | 543               | 62.80        | 0.497/0.001                         | 0.673/0.038  | 0.839/0.420    |
| U3IES1    | Annexin                                                                                    | 340               | 77.94        | 0.555/0.005                         | 0.955/0.021  | 0.794/0.015    |
| R0L497    | Cullin-associated<br>NEDD8-dissociated protein 1                                           | 1210              | 32.98        | 1.148/0.982                         | 0.832/0.041  | 0.649/0.026    |
| U3IPR3    | Lamin A/C                                                                                  | 643               | 52.41        | 0.964/0.363                         | 1.629/0.002  | 0.787/0.361    |
| U3J091    | Kinectin 1                                                                                 | 1349              | 28.54        | 0.847/0.274                         | 0.964/0.116  | 0.291/5.00E-06 |
| U3J4J3    | Acetyl-CoA acetyltransferase 1                                                             | 407               | 71.01        | 0.429/0.067                         | 1.294/0.224  | 2.270/0.0003   |
| U3J9R9    | AP-2 complex subunit alpha                                                                 | 936               | 39.74        | 0.920/0.858                         | 0.920/0.771  | 0.483/0.008    |
| U3I4I9    | Actinin alpha 1                                                                            | 662               | 54.38        | 1.127/0.745                         | 0.817/0.023  | 0.238/7.46E-06 |
| U3IB14    | DnaJ heat shock protein family<br>(Hsp40) member C13                                       | 2236              | 19.81        | 1.076/0.700                         | 1.180/0.602  | 1.528/0.003    |
| U3J3X9    | 5-aminoimidazole-4-carboxamide<br>ribonucleotide formyltransferase /<br>IMP cyclohydrolase | 597               | 66.67        | 0.809/0.130                         | 1.086/0.839  | 0.560/0.006    |
| U3J0G1    | Chaperonin containing TCP1<br>subunit 2                                                    | 535               | 56.82        | 0.325/0.002                         | 0.4831/0.004 | 0.802/0.432    |
| U3IF77    | T-complex 1                                                                                | 535               | 63.55        | 0.802/0.341                         | 0.637/0.045  | 0.667/0.547    |
| R0LZB0    | Protein disulfide-isomerase                                                                | 365               | 68.22        | 0.219/3.30E-05                      | 1/0.315      | 1.191/0.076    |
| U3IMD1    | Catenin alpha 1                                                                            | 905               | 42.98        | 0.759/0.075                         | 0.871/0.137  | 0.363/0.002    |
| R0KBX6    | Protein disulfide-isomerase                                                                | 615               | 36.1         | 0.363/7.34E-05                      | 0.679/0.027  | 1.786/3.87E-06 |
| U3IZA5    | ATP-dependent<br>6-phosphofructokinase                                                     | 756               | 44.18        | 1.225/0.536                         | 1.236/0.894  | 1.528/0.013    |
| T2HPU5    | Chaperonin containing TCP1,<br>subunit 5 (Epsilon)                                         | 399               | 72.68        | 0.479/0.026                         | 0.679/0.012  | 0.809/0.905    |
| U3IEG9    | Far upstream element binding<br>protein 1                                                  | 602               | 56.31        | 0.731/0.026                         | 1.191/0.569  | 0.275/0.027    |
| U3ILF5    | Phosphoglycerate kinase                                                                    | 416               | 74.76        | 0.360/0.003                         | 1.660/0.805  | 0.337/0.001    |
| U3I3S5    | Nicotinamide nucleotide<br>transhydrogenase                                                | 1090              | 34.5         | 0.655/0.008                         | 0.863/0.419  | 1.854/0.001    |
| U3IM50    | Septin 9                                                                                   | 570               | 51.93        | 0.592/0.007                         | 1.294/0.487  | 0.661/0.017    |
| U3IQ39    | Heterogeneous nuclear<br>ribonucleoprotein A3                                              | 380               | 47.89        | 0.597/0.018                         | 1.570/0.970  | 0.879/0.718    |
| U3J1L1    | Glyceraldehyde-3-phosphate<br>dehydrogenase                                                | 333               | 62.76        | 0.560/0.018                         | 0.973/0.406  | 0.964/0.415    |
| U3IIX3    | Rab GDP dissociation inhibitor                                                             | 365               | 77.26        | 1.096/0.313                         | 0.855/0.116  | 0.409/0.001    |

SI TABLE 1: continued

| Accession | Name                                                                               | Protein<br>Length | %Cov<br>(95)  | Fold change in expression / p-value |                    |                |
|-----------|------------------------------------------------------------------------------------|-------------------|---------------|-------------------------------------|--------------------|----------------|
|           |                                                                                    |                   |               | 12 hpi                              | 24 hpi             | 42 hpi         |
| R0LCU1    | Coatomer subunit gamma                                                             | 857               | 41.19         | 0.705/0.580                         | 0.625/0.009        | 0.679/0.0444   |
| R0JWN6    | Heterogeneous nuclear<br>ribonucleoprotein M                                       | 666               | 38.74         | 0.920/0.169                         | 2.070/0.098        | 2.208/0.001    |
| U3I9L4    | Dolichyl-diphosphooligosaccharide-<br>protein glycosyltransferase subunit 1        | 609               | 52.05         | 0.501/0.367                         | 1.047/0.030        | 1.754/0.002    |
| U3IRX8    | SEC31 homolog A, COPII coat complex<br>component                                   | 1215              | 24.28         | 0.982/0.831                         | 0.982/0.040        | 0.540/0.021    |
| R0JJW5    | Collagen alpha-2(VI) chain                                                         | 1020              | 26.18         | 0.887/0.575                         | 1.047/0.553        | 1.706/0.001    |
| U3J698    | Transketolase                                                                      | 594               | 49.49         | 0.497/0.046                         | 0.661/0.004        | 0.655/0.007    |
| R0LQ61    | T-complex protein 1 subunit zeta                                                   | 464               | 71.55         | 0.363/0.008                         | 0.766/0.521        | 0.904/0.105    |
| U3IE28    | Heterochromatin protein 1 binding<br>protein 3                                     | 559               | 38.28         | 0.575/0.002                         | 1.393/0.309        | 1.459/0.003    |
| U3IGC1    | SEC24 homolog C, COPII coat complex<br>component                                   | 1106              | 28.21         | 0.855/0.741                         | 0.679/0.053        | 0.643/0.040    |
| R0KME4    | Putative pre-mRNA-splicing factor<br>ATP-dependent RNA helicase DHX15              | 740               | 35.949<br>999 | 0.991/0.960                         | 1.127/0.865        | 1.738/0.009    |
| U3IEK7    | Hypoxia up-regulated 1                                                             | 973               | 31.96         | 1.028/0.905                         | 1.542/0.486        | 2.228/0.0003   |
| U3IXU2    | Heterogeneous nuclear<br>ribonucleoprotein U                                       | 547               | 42.96         | 0.787/0.023                         | 1.169/0.448        | 3.076/4.87E-09 |
| U3ILC4    | Tyrosine 3-monooxygenase/tryptophan<br>5-monooxygenase activation protein<br>theta | 246               | 71.95         | 0.991/0.582                         | 0.637/0.429        | 0.477/0.011    |
| R0JIB7    | Myosin-Ib                                                                          | 1136              | 21.65         | 1.236/0.127                         | 1.067/0.888        | 1.722/0.010    |
| U3I2D1    | Ubiquinol-cytochrome c reductase core<br>protein 1                                 | 461               | 52.71         | 0.946/0.827                         | 0.787/0.585        | 1.77/0.003     |
| U3ILQ7    | DNA topoisomerase I                                                                | 747               | 29.72         | 0.625/0.003                         | 1.259/0.768        | 0.938/0.381    |
| R0LR18    | DNA helicase                                                                       | 749               | 37.38         | 1/0.790                             | 1.086/0.575        | 2.655/0.002    |
| U3IX64    | Testin LIM domain protein                                                          | 423               | 60.76         | 0.619/0.007                         | 0.912/0.355        | 0.649/0.035    |
| U3IDM0    | Tyrosine--tRNA ligase                                                              | 524               | 44.08         | 0.991/0.470                         | 0.515/8.55<br>E-05 | 0.685/0.009    |
| U3IEX4    | Adducin 1                                                                          | 736               | 41.44         | 1.038/0.953                         | 0.920/0.741        | 0.185/3.24E-05 |
| U3ICM6    | Gelsolin                                                                           | 781               | 40.72         | 0.483/0.000<br>2                    | 0.871/0.071        | 0.380/0.0005   |
| U3I342    | Ubiquinol-cytochrome c reductase core<br>protein 2                                 | 457               | 54.05         | 0.766/0.022<br>8                    | 0.973/0.869        | 1.690/0.002    |
| U3IUR2    | Procollagen-lysine, 2-oxoglutarate<br>5-dioxygenase 2                              | 727               | 37.14         | 1.028/0.650                         | 1.047/0.850        | 2.032/0.002    |
| U3I7Q0    | Heterogeneous nuclear<br>ribonucleoprotein R                                       | 636               | 44.65         | 0.506/0.006                         | 1.191/0.564        | 0.711/0.944    |
| U3IFH4    | 6-phosphogluconate dehydrogenase,<br>decarboxylating                               | 466               | 48.07         | 0.575/0.219                         | 0.930/0.163        | 0.244/1.02E-05 |

SI TABLE 1: continued

| Accession | Name                                                               | Protein<br>Length | %Cov<br>(95)  | Fold change in expression / p-value |             |                |
|-----------|--------------------------------------------------------------------|-------------------|---------------|-------------------------------------|-------------|----------------|
|           |                                                                    |                   |               | 12 hpi                              | 24 hpi      | 42 hpi         |
| U3I593    | Receptor for activated C kinase 1                                  | 281               | 81.49         | 1/0.553                             | 0.429/0.001 | 0.525/0.050    |
| U3IIH9    | Proteasome 26S subunit,<br>non-ATPase 12                           | 420               | 57.86         | 0.938/0.607                         | 0.794/0.335 | 1.570/0.005    |
| U3I5M4    | Mannose receptor C type 2                                          | 1451              | 19.50         | 0.912/0.971                         | 0.661/0.004 | 0.353/1.45E-05 |
| U3J597    | Isocitrate dehydrogenase [NADP]                                    | 415               | 51.57         | 0.461/0.002                         | 0.738/0.059 | 0.299/1.97E-05 |
| U3IN22    | Nucleoporin 155                                                    | 1350              | 22.52         | 1.019/0.685                         | 1.159/0.643 | 1.786/0.002    |
| U3J849    | Dedicator of cytokinesis 7                                         | 2060              | 16.60         | 1.009/0.508                         | 1.644/0.016 | 1.318/0.007    |
| R0JQR6    | Tyrosine-protein kinase-like 7                                     | 865               | 28.9          | 0.752/0.360                         | 0.802/0.224 | 0.328/0.0001   |
| R0M3E5    | Band 4.1-like protein 2                                            | 992               | 26.71         | 0.904/0.142                         | 0.912/0.315 | 0.592/0.025    |
| U3IIL1    | Annexin                                                            | 341               | 61.58         | 0.661/0.124                         | 0.904/0.011 | 0.213/0.0003   |
| R0KW24    | 40S ribosomal protein S4                                           | 236               | 63.14         | 0.540/0.167                         | 0.839/0.189 | 1.888/0.039    |
| U3IZI5    | ARP3 actin related protein 3<br>homolog                            | 418               | 56.22         | 0.955/0.844                         | 0.718/0.056 | 0.497/0.001    |
| R0JFS9    | Inosine-5'-monophosphate<br>dehydrogenase                          | 436               | 51.83         | 0.614/0.067                         | 0.406/0.001 | 0.731/0.311    |
| U3ISN7    | Laminin subunit beta 1                                             | 1719              | 16.4          | 1.706/0.037                         | 1.271/0.066 | 1.096/0.082    |
| U3IV94    | Procollagen-lysine,2-oxoglutarate<br>5-dioxygenase 1               | 730               | 37.40         | 1.236/0.463                         | 1.076/0.804 | 1.644/0.008    |
| U3IZ48    | Lysine--tRNA ligase                                                | 554               | 38.63         | 1.009/0.422                         | 1.127/0.544 | 0.643/0.010    |
| R0JKK6    | Collagen alpha-1(VI) chain                                         | 1008              | 30.46         | 0.759/0.162                         | 1.459/0.663 | 2.333/0.008    |
| R0JMH7    | Alpha-actinin-2                                                    | 897               | 31.77         | 1.202/0.632                         | 0.673/0.079 | 0.242/7.18E-05 |
| U3J7Y9    | 40S ribosomal protein SA                                           | 320               | 63.44         | 1.009/0.428                         | 1.343/0.825 | 0.283/0.041    |
| U3IRV6    | Karyopherin subunit beta 1                                         | 875               | 29.49         | 0.724/0.947                         | 0.637/0.009 | 0.325/0.004    |
| S4SM24    | Eukaryotic initiation factor 4A-III                                | 352               | 52.27         | 0.964/0.793                         | 0.912/0.290 | 1.600/0.004    |
| U3ICG6    | Proteasome 26S subunit,<br>non-ATPase 3                            | 389               | 42.16         | 0.904/0.357                         | 0.655/0.040 | 1.514/0.009    |
| U3I8D8    | Triosephosphate isomerase                                          | 211               | 87.20         | 0.492/0.031                         | 1.445/0.529 | 0.157/1.18E-07 |
| R0JH14    | Glutamate dehydrogenase 1,<br>mitochondrial                        | 410               | 57.560<br>003 | 1.076/0.994                         | 1.057/0.760 | 1.528/0.018    |
| U3IQW9    | G protein subunit alpha i2                                         | 316               | 58.230<br>001 | 0.679/0.445                         | 0.929/0.622 | 2.355/0.011    |
| U3J8L3    | Solute carrier family 25 member 13                                 | 681               | 34.36         | 1.028/0.787                         | 1.038/0.950 | 1.644/0.038    |
| U3J680    | Caldesmon 1                                                        | 544               | 36.76         | 0.738/0.010                         | 1.047/0.886 | 0.093/4.28E-07 |
| U3IE74    | L-lactate dehydrogenase                                            | 336               | 48.21         | 0.685/0.178                         | 0.550/0.004 | 0.177/1.08E-06 |
| U3IEQ8    | Sjogren syndrome antigen B                                         | 423               | 36.64         | 0.520/0.002                         | 1.180/0.566 | 0.964/0.676    |
| R0LRH2    | 60S ribosomal protein L4                                           | 297               | 40.74         | 0.752/0.127                         | 0.724/0.312 | 1.977/0.034    |
| R0L6A3    | Bifunctional 3'-phosphoadenosine<br>5'-phosphosulfate synthetase 1 | 604               | 37.09         | 0.991/0.815                         | 1.096/0.596 | 1.923/0.011    |
| U3J188    | DnaJ homolog subfamily C member<br>10                              | 795               | 25.28         | 1.038/0.563                         | 1.294/0.875 | 1.514/0.008    |
| R0LJ39    | Peroxisredoxin-1                                                   | 201               | 66.67         | 0.535/0.010                         | 1/0.202     | 1.271/0.214    |

SI TABLE 1: continued

| Accession      | Name                                                                                 | Protein<br>Length | %Cov<br>(95) | Fold change in expression / p-value |                     |                     |
|----------------|--------------------------------------------------------------------------------------|-------------------|--------------|-------------------------------------|---------------------|---------------------|
|                |                                                                                      |                   |              | 12 hpi                              | 24 hpi              | 42 hpi              |
| R0L8K1         | Core histone macro-H2A.1                                                             | 372               | 54.84        | 0.863/0.295                         | 0.895/0.339         | 1.675/0.014         |
| U3IAY7         | Acyl-CoA dehydrogenase long chain                                                    | 428               | 37.85        | 1.038/0.744                         | 1.871/0.392         | 1.706/0.013         |
| R0L597         | Leukotriene A(4) hydrolase                                                           | 559               | 29.16        | 0.920/0.427                         | 0.855/0.167         | 0.429/0.001         |
| U3I4I4         | Fermitin family member 2                                                             | 684               | 36.99        | 0.738/0.165                         | 1.086/0.742         | 0.535/0.014         |
| U3J830         | Peroxidasin                                                                          | 1419              | 17.62        | 1.117/0.350                         | 0.856/0.243         | 0.506/0.010         |
| U3IBB9         | Nuclear autoantigenic sperm protein                                                  | 719               | 30.46        | 0.738/0.112                         | 1.159/0.363         | 0.425/0.007         |
| R0LC54         | DNA repair protein RAD50                                                             | 1312              | 14.86        | 1.117/0.252                         | 1.225/0.558         | 1.542/0.011         |
| A0A0B5J<br>QU7 | Viperin                                                                              | 363               | 42.70        | 3.565/0.059                         | 32.509/2.42<br>E-08 | 28.840/1.27E-<br>07 |
| U3IC85         | Ribosomal protein L7a                                                                | 270               | 44.07        | 0.492/0.017                         | 0.731/0.137         | 1.499/0.032         |
| U3IIW5         | Tyrosine 3-monooxygenase/tryptophan<br>5-monooxygenase activation protein<br>epsilon | 234               | 73.08        | 0.832/0.048                         | 0.698/8.22<br>E-05  | 0.360/0.006         |
| R0LH42         | ATP-binding cassette sub-family E<br>member 1                                        | 610               | 38.03        | 0.824/0.583                         | 0.575/0.010         | 0.759/0.147         |
| R0M4W3         | A-kinase anchor protein 12                                                           | 959               | 21.38        | 0.773/0.128                         | 1.019/0.710         | 0.121/2.36E-0<br>5  |
| R0LRM7         | Destrin                                                                              | 165               | 79.39        | 0.137/0.012                         | 0.360/0.004         | 0.535/0.100         |
| R0LLK8         | Decorin                                                                              | 357               | 56.02        | 0.745/0.296                         | 0.800/0.437         | 2.333/0.002         |
| U3II57         | Cytochrome P450 family 51 subfamily A<br>member 1                                    | 483               | 34.58        | 0.824/0.099                         | 1/0.995             | 2.208/0.002         |
| U3J3V1         | Electron transfer flavoprotein<br>dehydrogenase                                      | 622               | 35.53        | 0.759/0.656                         | 1.213/0.671         | 1.675/0.003         |
| U3IUJ4         | Ubiquitin like modifier activating enzyme<br>2                                       | 591               | 43.65        | 0.661/0.025                         | 1.282/0.419         | 1.009/0.794         |
| R0KHM3         | Interferon-induced protein with<br>tetratricopeptide repeats 5                       | 480               | 36.25        | 5.395/0.029                         | 40.551/6.78<br>E-08 | 51.050/3.34E-<br>09 |
| U3J083         | DNA helicase                                                                         | 808               | 25.87        | 1/0.795                             | 0.938/0.689         | 1.770/0.012         |
| U3INE4         | Carnosine dipeptidase 2                                                              | 478               | 40.38        | 0.794/0.444                         | 0.912/0.185         | 0.308/1.35E-0<br>6  |
| U3J4F7         | Proline and arginine rich end leucine rich<br>repeat protein                         | 319               | 55.49        | 1.057/0.543                         | 0.724/0.053         | 1.977/0.004         |
| U3IWQ6         | Adenylyl cyclase-associated protein                                                  | 475               | 34.53        | 0.787/0.332                         | 0.938/0.749         | 0.474/0.001         |
| U3J5E2         | S-(hydroxymethyl)glutathione<br>dehydrogenase                                        | 376               | 36.17        | 0.525/0.004                         | 0.575/0.005         | 0.619/0.032         |
| U3J9R8         | Alpha-1,4 glucan phosphorylase                                                       | 836               | 32.54        | 0.839/0.772                         | 1.067/0.721         | 0.540/0.012         |
| U3INII         | DEAD-box helicase 5                                                                  | 602               | 51.33        | 1.148/0.500                         | 1.472/0.782         | 1.837/0.0277        |
| U3J4E5         | Ribosomal protein S3                                                                 | 247               | 57.09        | 1.380/0.605                         | 0.724/0.077         | 1.738/0.044         |
| R0M2V6         | Ubiquitin-like modifier-activating enzyme<br>6                                       | 1003              | 19.04        | 1.528/0.049                         | 0.887/0.809         | 1.306/0.173         |
| U3IR67         | Hydroxysteroid 17-beta dehydrogenase 4                                               | 740               | 24.32        | 1.905/0.057                         | 1.057/0.708         | 1.888/0.039         |

SI TABLE 1: continued

| Accession | Name                                                    | Protein<br>Length | %Cov<br>(95) | Fold change in expression / p-value |              |                |
|-----------|---------------------------------------------------------|-------------------|--------------|-------------------------------------|--------------|----------------|
|           |                                                         |                   |              | 12 hpi                              | 24 hpi       | 42 hpi         |
| U3ICC7    | Coronin                                                 | 480               | 30.63        | 0.738/0.339                         | 1.159/0.832  | 0.592/0.049    |
| U3IUC4    | Actin-related protein 2/3 complex<br>subunit            | 370               | 46.76        | 0.855/0.431                         | 0.990/0.307  | 0.501/0.008    |
| R0L313    | Neurogenic locus notch-like protein 2                   | 2412              | 11.4         | 1.656/0.014                         | 1/0.338      | 0.895/0.867    |
| U3ILE9    | Apoptosis inhibitor 5                                   | 522               | 24.71        | 0.787/0.502                         | 0.787/0.198  | 0.575/0.049    |
| U3ISF4    | Succinyl-CoA:3-ketoacid-coenzyme A<br>transferase       | 516               | 35.66        | 0.483/0.149                         | 0.479/0.010  | 1.294/0.274    |
| U3ILN2    | Ribosomal protein S2                                    | 234               | 58.97        | 0.363/0.012                         | 0.470/0.008  | 1.419/0.124    |
| U3IWX3    | Sorting nexin                                           | 401               | 36.16        | 0.608/0.033                         | 1.294/0.474  | 0.982/0.762    |
| R0K3R7    | Melanoma inhibitory activity protein 3                  | 1913              | 10.61        | 0.592/0.014                         | 0.787/0.304  | 1.117/0.421    |
| U3INM7    | Carnitine palmitoyltransferase 2                        | 655               | 26.11        | 0.863/0.156                         | 0.964/0.216  | 1.923/0.012    |
| R0LBH9    | Peptidyl-prolyl cis-trans isomerase                     | 134               | 82.84        | 0.581/0.003                         | 1.368/0.769  | 1.406/0.121    |
| U3IFW5    | Voltage dependent anion channel 3                       | 296               | 60.81        | 0.453/0.040                         | 0.731/0.093  | 1.472/0.073    |
| U3J1N9    | GTP-binding nuclear protein Ran                         | 216               | 46.76        | 0.350/0.006                         | 0.603/0.627  | 1.675/0.010    |
| U3IRI9    | Collagen type V alpha 1 chain                           | 1841              | 14.94        | 0.586/0.742                         | 0.488/0.091  | 0.275/0.0007   |
| U3J2Z0    | Heterogeneous nuclear<br>ribonucleoprotein A/B          | 263               | 41.83        | 0.445/0.033                         | 1.318/0.409  | 0.625/0.087    |
| U3J175    | ATP synthase peripheral<br>stalk-membrane<br>subunit b  | 228               | 47.81        | 0.895/0.157                         | 0.759/0.035  | 1.600/0.033    |
| R0KGG1    | BAT2 domain-containing protein 1                        | 2752              | 11.34        | 0.525/0.092                         | 1.614/0.221  | 0.288/0.006    |
| U3IN94    | Keratin 19                                              | 413               | 36.56        | 0.711/0.255                         | 0.429/0.014  | 1.820/0.042    |
| R0JMV5    | Bleomycin hydrolase                                     | 420               | 34.52        | 0.377/0.016                         | 0.780/0.202  | 0.457/0.020    |
| R0M3M9    | Collagen alpha-1(III) chain                             | 1453              | 22.71        | 0.752/0.982                         | 0.515/0.009  | 0.085/8.56E-05 |
| U3J9U8    | DNA helicase                                            | 823               | 16.4         | 1.159/0.577                         | 0.832/0.374  | 1.629/0.0135   |
| U3IU67    | Calponin                                                | 331               | 46.22        | 0.832/0.111                         | 0.592/0.023  | 0.510/0.111    |
| U3J383    | Phosphoglucomutase 1                                    | 566               | 29.51        | 0.817/0.756                         | 0.692/0.047  | 0.575/0.019    |
| U3ITQ7    | Protein disulfide isomerase family A<br>member 6        | 444               | 33.78        | 0.643/0.121                         | 2.582/0.776  | 1.644/0.038    |
| U3I8X7    | Malic enzyme                                            | 583               | 29.50        | 1.057/0.973                         | 0.964/0.911  | 1.556/0.040    |
| U3I6I6    | Atlastin GTPase 1                                       | 558               | 28.32        | 0.802/0.981                         | 0.6199/0.588 | 1.820/0.024    |
| R0M0E4    | Microtubule-associated protein RP/EB<br>family member 1 | 226               | 50.88        | 0.453/0.004                         | 0.7319/0.202 | 0.540/0.004    |
| R0KXC4    | Protein DJ-1                                            | 189               | 79.37        | 0.809/0.216                         | 0.766/0.489  | 0.268/0.0002   |
| U3IB74    | Protein O-fucosyltransferase 1                          | 306               | 57.52        | 0.863/0.205                         | 1.038/0.574  | 1.888/0.016    |
| U3ISV5    | Centrosomal protein 170                                 | 1579              | 10.07        | 1.528/0.047                         | 1.380/0.114  | 0.955/0.749    |
| U3J8S6    | MutS homolog 6                                          | 1280              | 11.25        | 0.863/0.151                         | 1.393/0.238  | 1.644/0.014    |
| U3J4Z3    | Nucleosome assembly protein 1 like 4                    | 354               | 35.59        | 1.117/0.793                         | 1.086/0.746  | 0.474/0.009    |
| R0LKT3    | Receptor protein-tyrosine kinase                        | 1075              | 17.67        | 1.159/0.541                         | 0.887/0.356  | 0.501/0.002    |
| R0LNH9    | Collagen alpha-2(V) chain                               | 1464              | 21.99        | 0.946/0.976                         | 1.180/0.876  | 0.421/0.048    |

SI TABLE 1: continued

| Accession      | Name                                                         | Protein<br>Length | % Cov<br>(95) | Fold change in expression / p-value |                    |                |
|----------------|--------------------------------------------------------------|-------------------|---------------|-------------------------------------|--------------------|----------------|
|                |                                                              |                   |               | 12 hpi                              | 24 hpi             | 42 hpi         |
| U3I321         | 2',3'-cyclic nucleotide 3'<br>phosphodiesterase              | 422               | 31.28         | 1.660/0.384                         | 3.565/0.0003       | 4.325/6.65E-07 |
|                | NADH dehydrogenase                                           |                   |               |                                     |                    |                |
| U3I8R9         | [ubiquinone] 1 alpha subcomplex<br>subunit 10, mitochondrial | 355               | 47.61         | 0.904/0.557                         | 1.170/0.983        | 1.514/0.038    |
| R0JFQ9         | Peroxisome oxidin-6                                          | 142               | 77.46         | 0.592/0.143                         | 1.191/0.706        | 0.263/0.0006   |
| R0JK78         | Phosphate carrier protein,<br>mitochondrial                  | 309               | 36.57         | 0.661/0.316                         | 1.019/0.923        | 1.629/0.017    |
| U3IVD1         | RB binding protein 4, chromatin<br>remodeling factor         | 425               | 44.24         | 0.586/0.429                         | 0.832/0.864        | 0.251/0.022    |
| U3ILP7         | Peptidase D                                                  | 497               | 31.59         | 0.973/0.554                         | 0.871/0.634        | 0.236/4.28E-05 |
| U3J8D3         | High mobility group box 3                                    | 180               | 45.56         | 0.603/0.036                         | 0.929/0.946        | 0.711/0.176    |
| U3HYT7         | Cellular retinoic acid binding<br>protein 1                  | 135               | 65.93         | 0.619/0.038                         | 0.625/0.023        | 0.305/0.001    |
| R4HH66         | Desmin                                                       | 302               | 57.28         | 1.076/0.952                         | 0.929/0.740        | 0.270/0.001    |
| U3IQT7         | UTP--glucose-1-phosphate<br>uridylyltransferase              | 509               | 27.31         | 0.817/0.031                         | 1.086/0.765        | 0.432/0.006    |
| R0LR13         | ELKS/RAB6-interacting/CAST<br>family member 1                | 1117              | 13.16         | 1.067/0.677                         | 1.247/0.088        | 0.614/0.015    |
|                | Dolichyl-diphosphooligosaccharid                             |                   |               |                                     |                    |                |
| U3IH78         | e--protein glycosyltransferase 48<br>kDa subunit             | 377               | 33.42         | 1.009/0.777                         | 1.127/0.786        | 2.270/0.038    |
| A0A0M4R<br>WG0 | Zinc finger CCCH-type antiviral<br>protein 1                 | 717               | 20.36         | 2.291/0.002                         | 3.221/7.41E-0<br>5 | 2.291/0.001    |
| U3J057         | Phosphatidylethanolamine binding<br>protein 1                | 151               | 64.90         | 1.057/0.375                         | 1.247/0.605        | 0.185/0.0003   |
| U3IBU3         | Prohibitin 2                                                 | 231               | 43.72         | 0.759/0.086                         | 0.787/0.583        | 2.032/0.020    |
| R0LIL9         | ATP synthase subunit O,<br>mitochondrial                     | 184               | 60.87         | 0.319/0.012                         | 0.990/0.434        | 1.995/0.005    |
| U3J894         | Proteasome subunit alpha type                                | 255               | 50.20         | 0.614/0.077                         | 1.294/0.622        | 0.387/0.026    |
| R0J6Z5         | 60S acidic ribosomal protein P0                              | 137               | 67.88         | 0.425/0.019                         | 0.661/0.690        | 0.649/0.807    |
| R0LQ12         | 23 kDa cortical<br>cytoskeleton-associated protein           | 244               | 53.28         | 0.082/0.009                         | 0.506/0.101        | 0.437/0.005    |
| U3IZC4         | Glutaredoxin 3                                               | 334               | 35.63         | 0.938/0.482                         | 0.832/0.712        | 0.631/0.020    |
| U3I6H8         | Laminin subunit gamma 1                                      | 1544              | 10.23         | 1.236/0.850                         | 1.660/0.033        | 1.722/0.016    |
| U3ILU0         | 40S ribosomal protein S12                                    | 132               | 74.24         | 0.655/0.008                         | 0.832/0.792        | 0.673/0.032    |
| R0K0M8         | Cofilin-2                                                    | 166               | 74.1          | 0.673/0.154                         | 0.649/0.039        | 0.492/0.033    |
| R0L513         | Eukaryotic translation initiation<br>factor 3 subunit I      | 325               | 44.62         | 0.724/0.203                         | 1.019/0.452        | 0.597/0.038    |
| U3IXX2         | SAC1 like phosphatidylinositol<br>phosphatase                | 589               | 22.24         | 1.191/0.795                         | 0.955/0.238        | 1.585/0.039    |

SI TABLE 1: continued

| Accession | Name                                                             | Protein<br>Length | %Cov<br>(95) | Fold change in expression / p-value |              |                |
|-----------|------------------------------------------------------------------|-------------------|--------------|-------------------------------------|--------------|----------------|
|           |                                                                  |                   |              | 12 hpi                              | 24 hpi       | 42 hpi         |
| U3J5C4    | Squalene epoxidase                                               | 478               | 26.15        | 0.946/0.615                         | 1.057/0.817  | 1.905/0.021    |
| R0KZE1    | Glucocorticoid receptor<br>DNA-binding factor 1                  | 1425              | 9.05         | 1.406/0.119                         | 2.014/0.022  | 1.380/0.471    |
| R0JD86    | Cathepsin B                                                      | 340               | 32.35        | 0.955/0.447                         | 0.824/0.934  | 0.207/0.003    |
| R0JS60    | Proteasome endopeptidase complex                                 | 246               | 54.47        | 0.718/0.343                         | 1.259/0.628  | 0.308/0.015    |
| U3IHK6    | Glyoxalase domain containing 4                                   | 300               | 43.33        | 0.766/0.150                         | 1.271/0.896  | 0.288/0.002    |
| U3IQE2    | Eukaryotic translation termination<br>factor 1                   | 409               | 36.92        | 0.904/0.816                         | 0.955/0.128  | 0.331/0.028    |
| R0L2K9    | ATP-dependent RNA helicase<br>DDX42                              | 940               | 15.74        | 1.306/0.230                         | 1.556/0.232  | 0.406/0.012    |
| U3IEH8    | Acetyl-CoA acetyltransferase 2                                   | 336               | 48.81        | 1.138/0.607                         | 0.887/0.831  | 0.441/0.009    |
| U3J9N9    | Microtubule associated protein<br>RP/EB family member 2          | 288               | 40.28        | 0.643/0.013                         | 0.895/0.865  | 0.895/0.550    |
| U3J0H8    | Elastin microfibril interfacier 2                                | 1035              | 13.14        | 1.445/0.563                         | 1.923/0.019  | 1.754/0.058    |
| U3J0N2    | NEDD8-activating enzyme E1<br>regulatory subunit                 | 536               | 24.63        | 1.754/0.042                         | 1.236/0.613  | 0.773/0.458    |
| R0JXM5    | Malate dehydrogenase                                             | 334               | 33.53        | 0.817/0.211                         | 0.946/0.053  | 0.217/0.021    |
| R0KAH1    | Protein SEC13-like protein                                       | 304               | 41.45        | 0.787/0.237                         | 0.871/0.559  | 0.603/0.043    |
| R0JYN0    | Prostaglandin F2 receptor negative<br>regulator                  | 878               | 13.1         | 1.202/0.438                         | 1.282/0.140  | 1.585/0.031    |
| U3IDM4    | Raftlin family member 2                                          | 432               | 4.86         | 0.603/0.005                         | 17.219/0.020 | 1.905/0.007    |
| U3IDM1    | Small nuclear ribonucleoprotein<br>polypeptide A'                | 234               | 29.06        | 1.096/0.440                         | 0.929/0.997  | 0.603/0.034    |
| U3HYT9    | Ribosomal protein L23a                                           | 156               | 43.59        | 0.483/0.004                         | 0.501/0.066  | 1.169/0.212    |
| R0KET6    | Glutathione S-transferase 3                                      | 223               | 35.43        | 0.780/0.491                         | 1.009/0.259  | 0.244/0.002    |
| U3IN21    | BH3 interacting domain death<br>agonist                          | 193               | 67.36        | 0.895/0.672                         | 2.704/0.182  | 1.754/0.01     |
| R0JNU8    | Acidic leucine-rich nuclear<br>phosphoprotein 32 family member A | 199               | 35.18        | 0.673/0.052                         | 0.686/0.049  | 0.437/0.030    |
| R0JBT4    | RING finger protein 213                                          | 4165              | 3.99         | 2.754/0.007                         | 3.597/0.0002 | 2.965/5.94E-07 |
| U3ITT8    | Proteasome endopeptidase complex                                 | 222               | 56.31        | 0.946/0.245                         | 0.692/0.379  | 0.525/0.010    |
| U3IWZ8    | Phosphomannomutase                                               | 234               | 39.32        | 0.879/0.699                         | 0.879/0.672  | 0.550/0.021    |
| U3IL75    | Phosphoglucomutase 2                                             | 611               | 15.22        | 0.817/0.869                         | 0.938/0.590  | 0.299/0.020    |
| R0LM55    | Translin                                                         | 176               | 37.5         | 0.855/0.794                         | 1.009/0.665  | 0.380/0.037    |
| U3IQA5    | Cystathionine beta-synthase                                      | 568               | 18.84        | 1.096/0.797                         | 1.306/0.392  | 0.501/0.027    |
| U3J3H8    | RAB3 GTPase activating protein<br>catalytic subunit 1            | 986               | 12.98        | 1.722/0.026                         | 1.169/0.776  | 0.511/0.180    |
| U3J679    | Nucleoporin 160                                                  | 1335              | 9.74         | 1.660/0.329                         | 1.585/0.201  | 1.77/0.024     |
| U3ITG1    | Pre-mRNA processing factor 39                                    | 591               | 17.6         | 0.863/0.665                         | 1.169/0.662  | 2.355/0.006    |
| U3IR35    | Stathmin                                                         | 149               | 32.21        | 0.698/0.366                         | 0.643/0.302  | 0.291/0.034    |
| U3J7N6    | Sperm associated antigen 9                                       | 1207              | 10.77        | 1.076/0.408                         | 1.445/0.096  | 0.474/0.001    |



SI TABLE 1: continued

| Accession | Name                                                              | Protein<br>Length | %Cov<br>(95) | Fold change in expression / p-value |                 |                 |
|-----------|-------------------------------------------------------------------|-------------------|--------------|-------------------------------------|-----------------|-----------------|
|           |                                                                   |                   |              | 12 hpi                              | 24 hpi          | 42 hpi          |
| R0K108    | Double-stranded RNA-binding protein Staufen-like protein 1        | 712               | 19.24        | 1.009/0.551                         | 0.929/0.831     | 0.540/0.029     |
| U3I946    | Arp2/3 complex 34 kDa subunit                                     | 300               | 34.33        | 0.685/0.097                         | 0.698/0.211     | 0.614/0.047     |
| R0JP63    | Farnesyl pyrophosphate synthetase                                 | 258               | 24.81        | 0.817/0.864                         | 0.809/0.906     | 0.545/0.045     |
| U3IQF4    | NADH-cytochrome b5 reductase                                      | 300               | 47.67        | 1.236/0.638                         | 0.540/0.029     | 1.77/0.123      |
| R0K221    | Huntingtin-interacting protein 1                                  | 973               | 11.82        | 1.542/0.088                         | 1.690/0.040     | 1.318/0.304     |
| U3I6U1    | Rho GDP dissociation inhibitor beta                               | 206               | 69.42        | 0.773/0.458                         | 0.802/0.061     | 0.377/0.002     |
| U3INF1    | Mitochondrial calcium uniporter                                   | 301               | 32.56        | 0.839/0.859                         | 1.271/0.450     | 2.489/0.007     |
| U3J6G2    | Tropomyosin 3                                                     | 252               | 58.33        | 0.929/0.069                         | 0.895/0.458     | 0.497/0.004     |
| U3IPL5    | Golgin B1                                                         | 3201              | 6.59         | 1.170/0.167                         | 1.213/0.296     | 0.586/0.016     |
| R0LZW3    | Thymocyte nuclear protein 1                                       | 228               | 38.60        | 0.738/0.931                         | 1.028/0.606     | 0.163/0.024     |
| U3ITC1    | STT3B, catalytic subunit of the oligosaccharyltransferase complex | 776               | 10.7         | 1.514/0.816                         | 1.127/0.969     | 2.356/0.003     |
| U3I7S4    | Zyxin                                                             | 581               | 23.06        | 1.019/0.621                         | 1.107/0.576     | 0.360/0.016     |
| U3J8B7    | RUN and FYVE domain containing 3                                  | 600               | 14           | 1.259/0.411                         | 1.432/0.544     | 2.109/0.039     |
| R0LI37    | FKBP12-rapamycin complex-associated protein                       | 2516              | 5.92         | 1.096/0.528                         | 2.312/0.003     | 0.855/0.436     |
| R0LJZ9    | UMP-CMP kinase 2, mitochondrial                                   | 149               | 53.69        | 1.393/0.240                         | 16.444/0.018    | 18.535/0.001    |
| U3IQV1    | Glycylpeptide N-tetradecanoyltransferase                          | 454               | 20.93        | 0.752/0.585                         | 0.920/0.747     | 0.466/0.043     |
| R0K4R2    | Cell division control protein 42-like protein                     | 192               | 34.38        | 0.310/0.0005                        | 0.555/0.208     | 0.912/0.524     |
| U3I676    | Branched-chain-amino-acid aminotransferase                        | 381               | 18.11        | 1.191/0.711                         | 1.380/0.465     | 0.441/0.038     |
| R0LR53    | Catenin alpha-2                                                   | 553               | 26.04        | 0.773/0.997                         | 1.923/0.021     | 0.649/0.279     |
| U3I8M2    | Interferon induced protein 35                                     | 300               | 32.67        | 5.297/0.002                         | 16.904/5.06E-05 | 12.023/6.56E-05 |
| U3ITE5    | Lectin, mannose binding 2                                         | 276               | 22.1         | 0.692/0.149                         | 0.773/0.354     | 1.888/0.029     |
| R0M464    | Eukaryotic translation initiation factor 3 subunit J              | 171               | 57.31        | 0.871/0.685                         | 1.057/0.590     | 0.242/0.007     |
| R0M884    | Glutathione S-transferase                                         | 222               | 33.78        | 0.824/0.448                         | 0.685/0.140     | 0.108/0.001     |
| R0JDK1    | Hemoglobin subunit pi                                             | 142               | 49.30        | 0.350/0.004                         | 0.055/0.0004    | 0.356/0.035     |
| U3ID57    | Aminopeptidase                                                    | 949               | 6.96         | 1.419/0.235                         | 1.770/0.1290    | 1.722/0.014     |
| U3J0D3    | Epsin 2                                                           | 664               | 12.50        | 1.169/0.248                         | 0.824/0.187     | 0.520/0.049     |
| U3INZ8    | SH3 domain-binding glutamic acid-rich-like protein                | 114               | 68.42        | 0.745/0.459                         | 1.180/0.509     | 0.138/0.008     |
| U3J5E9    | Osteoclast stimulating factor 1                                   | 207               | 38.65        | 0.929/0.589                         | 1.107/0.854     | 0.421/0.020     |
| U3I6H4    | Lactoylglutathione lyase                                          | 185               | 32.43        | 0.711/0.421                         | 0.773/0.530     | 0.337/0.006     |
| U3I632    | Calcium/calmodulin dependent protein kinase kinase 2              | 484               | 16.74        | 1.959/0.027                         | 1.343/0.2993    | 1.318/0.240     |

SI TABLE 1: continued

| Accession      | Name                                                    | Protein<br>Length | %Cov<br>(95) | Fold change in expression / p-value |              |              |
|----------------|---------------------------------------------------------|-------------------|--------------|-------------------------------------|--------------|--------------|
|                |                                                         |                   |              | 12 hpi                              | 24 hpi       | 42 hpi       |
| U3IQH4         | Protein-L-isoaspartate<br>O-methyltransferase           | 227               | 48.90        | 1.009/0.575                         | 0.991/0.533  | 0.661/0.036  |
| U3IHG9         | Ribosomal protein S20                                   | 118               | 49.15        | 0.265/0.189                         | 0.391/0.209  | 0.530/0.049  |
| U3IEL6         | Stomatin                                                | 282               | 26.24        | 1.786/0.023                         | 1.306/0.243  | 0.787/0.680  |
| R0LDU8         | VPS10 domain-containing receptor<br>SorCS2              | 920               | 8.80         | 0.581/0.200                         | 0.847/0.270  | 0.603/0.049  |
| U3J4D8         | Prefoldin subunit 3                                     | 194               | 32.47        | 0.955/0.649                         | 0.964/0.479  | 0.432/0.021  |
| U3IFS6         | Thioredoxin domain containing 17                        | 75                | 56.00        | 0.731/0.961                         | 1.191/0.945  | 0.421/0.029  |
| R0K419         | Heme oxygenase 1                                        | 297               | 22.90        | 0.938/0.308                         | 0.787/0.293  | 0.322/0.006  |
| U3IOC5         | Lymphocyte cytosolic protein 1                          | 626               | 18.21        | 1.754/0.238                         | 1.318/0.685  | 0.238/0.018  |
| Q1XHT3         | Beta-2-microglobulin                                    | 96                | 68.75        | 3.373/0.135                         | 13.804/0.003 | 9.036/0.003  |
| U3IA01         | Hematopoietic prostaglandin D<br>synthase               | 202               | 23.27        | 0.631/0.604                         | 0.545/0.020  | 0.766/0.570  |
| R0J8D8         | Cartilage intermediate layer protein<br>2               | 420               | 15.95        | 7.727/0.009                         | 23.550/0.001 | 19.055/0.005 |
| A0A0A1CT<br>T9 | Yes-associated protein 1                                | 415               | 19.28        | 1.057/0.947                         | 1.159/0.573  | 0.254/0.047  |
| U3IS83         | Arginyl aminopeptidase                                  | 447               | 13.42        | 1.057/0.997                         | 0.766/0.118  | 0.441/0.033  |
| U3IZD8         | Solute carrier family 25 member 22                      | 277               | 16.25        | 1.138/0.894                         | 1.180/0.699  | 2.630/0.014  |
| U3IQD4         | Leucine zipper and CTNNBIP1<br>domain containing        | 190               | 27.89        | 1.406/0.956                         | 1.047/0.732  | 0.373/0.041  |
| U3HZM9         | Glutathione reductase                                   | 493               | 14.00        | 1.271/0.916                         | 1.629/0.043  | 0.673/0.682  |
| R0L0F4         | Double-stranded RNA-specific<br>adenosine deaminase     | 935               | 5.78         | 1.514/0.347                         | 3.342/0.036  | 1.445/0.289  |
| R0LJJ2         | Poly [ADP-ribose] polymerase                            | 1803              | 3.44         | 1.076/0.462                         | 2.938/0.026  | 2.535/0.731  |
| U3J929         | SUMO-conjugating enzyme                                 | 162               | 22.84        | 0.661/0.049                         | 0.738/0.091  | 0.855/0.464  |
| R0LB59         | Protein phosphatase 1G                                  | 522               | 14.18        | 0.180/0.003                         | 0.614/0.080  | 1.500/0.887  |
| U3IYB8         | Cell division cycle 37                                  | 233               | 20.17        | 0.511/0.608                         | 0.413/0.036  | 0.575/0.258  |
| R0LPW1         | Huntingtin                                              | 3092              | 2.10         | 1.977/0.050                         | 1.585/0.106  | 1.380/0.509  |
| U3IAD3         | Tumor protein,<br>translationally-controlled 1          | 138               | 23.91        | 0.470/0.045                         | 0.667/0.378  | 0.938/0.933  |
| U3IQE3         | Glycerol-3-phosphate<br>dehydrogenase [NAD(+)]          | 350               | 16.57        | 0.847/0.580                         | 0.685/0.692  | 0.242/0.023  |
| R0KBG0         | Metalloproteinase inhibitor 3                           | 212               | 13.21        | 1.259/0.787                         | 0.705/0.659  | 3.048/0.025  |
| R0K8T8         | Sterile alpha motif<br>domain-containing protein 9-like | 1537              | 3.97         | 1.236/0.030                         | 1.644/0.053  | 3.105/0.004  |
| U3INW9         | Connective tissue growth factor                         | 267               | 11.99        | 0.597/0.153                         | 1.380/0.391  | 6.546/0.029  |
| A0A0U2V8<br>A4 | Alpha D globin subunit                                  | 141               | 37.59        | 0.384/0.330                         | 0.217/0.008  | 0.787/0.126  |
| U3IBX8         | FRAS1 related extracellular matrix<br>protein 2         | 3044              | 1.58         | 1.432/0.055                         | 1.528/0.0230 | 1.282/0.323  |

SI TABLE 1: continued

| Accession | Name                                                    | Protein<br>Length | %Cov<br>(95) | Fold change in expression / p-value |                     |                     |
|-----------|---------------------------------------------------------|-------------------|--------------|-------------------------------------|---------------------|---------------------|
|           |                                                         |                   |              | 12 hpi                              | 24 hpi              | 42 hpi              |
| U3IGS4    | AP complex subunit beta                                 | 952               | 44.01        | 0.679/0.041                         | 0.879/0.188         | 0.550/0.027         |
| U3HZJ9    | Ribosome binding protein 1                              | 954               | 40.99        | 1.086/0.409                         | 1.343/0.513         | 0.203/2.46E-1<br>2  |
| R0L6N6    | Protein disulfide-isomerase                             | 425               | 74.82        | 0.356/6.15<br>E-05                  | 1.282/0.468         | 1.722/9.50E-0<br>5  |
| R0JMZ7    | T-complex protein 1 subunit theta                       | 528               | 71.0         | 0.667/0.106                         | 0.525/0.001         | 0.855/0.847         |
| R0LE95    | Alpha-1,4 glucan phosphorylase                          | 828               | 49.03        | 1.107/0.581                         | 0.938/0.162         | 0.384/0             |
| R0JU09    | Cytoskeleton-associated protein 4                       | 444               | 70.72        | 0.738/0.049                         | 1.282/0.864         | 1.675/0             |
| U3I0A3    | Keratin 7                                               | 492               | 66.87        | 0.461/0.004                         | 0.441/0             | 2.148/7.99E-0<br>5  |
| U3I935    | Moesin                                                  | 578               | 59.86        | 0.570/0.005                         | 1.271/0.884         | 0.215/3.01E-0<br>7  |
| U3IC15    | Aconitate hydratase, mitochondrial                      | 786               | 51.27        | 0.560/0.086                         | 0.752/0.258         | 1.923/0.001         |
| U3IGY5    | Aspartate aminotransferase                              | 427               | 78.69        | 0.466/0.010                         | 1.542/0.896         | 1.871/0.001         |
| R0KF12    | Nuclear pore complex protein Nup93                      | 819               | 29.06        | 1.432/0.055                         | 0.824/0.916         | 1.542/0             |
| U3J0T9    | Insulin like growth factor 2 mRNA<br>binding protein 3  | 584               | 46.75        | 0.667/0.054                         | 1.306/0.494         | 2.208/0.040         |
| R0LMN3    | DNA helicase                                            | 890               | 31.57        | 1.009/0.479                         | 1.096/0.947         | 1.706/0.013         |
| U3IUB6    | Elongation factor Tu GTP binding<br>domain containing 2 | 972               | 33.64        | 0.991/0.653                         | 0.991/0.721         | 1.629/0.017         |
| R0KDL4    | 26S proteasome non-ATPase<br>regulatory subunit 1       | 935               | 31.66        | 0.912/0.888                         | 0.794/0.169         | 1.614/0.013         |
| U3I939    | Fructose-bisphosphate aldolase                          | 335               | 68.66        | 0.887/0.066                         | 3.076/0.265         | 0.479/7.02E-0<br>5  |
| R0JQ38    | Tenascin                                                | 2172              | 16.44        | 0.964/0.702                         | 0.955/0.119         | 3.192/1.56E-0<br>5  |
| U3IA60    | Malate dehydrogenase                                    | 338               | 77.22        | 0.655/0.073                         | 0.794/0.220         | 1.570/0.007         |
| R0KN24    | Xaa-Pro aminopeptidase 1                                | 624               | 54.33        | 0.817/0.272                         | 0.685/0.0153        | 0.575/0.025         |
| R0LVN5    | Echinoderm microtubule-associated<br>protein-like 4     | 970               | 24.85        | 0.847/0.479                         | 0.809/0.440         | 0.113/6.34E-0<br>6  |
| U3J8P0    | Mov10 RISC complex RNA helicase                         | 924               | 27.60        | 1.600/0.042                         | 11.803/2.37E-<br>06 | 15.996/4.05E-<br>09 |
| R0JGG2    | Hydroxymethylglutaryl-CoA synthase                      | 525               | 44           | 0.488/0.040                         | 0.745/0.011         | 0.738/0.325         |
| U3IXM0    | Peptidylprolyl isomerase                                | 422               | 48.82        | 0.614/0.009                         | 0.773/0.011         | 0.441/0.001         |
| R0LHZ1    | 3-ketoacyl-CoA thiolase,<br>mitochondrial               | 397               | 59.7         | 0.895/0.455                         | 0.964/0.452         | 1.722/0.024         |
| U3IRP3    | Glucose-6-phosphate isomerase                           | 560               | 47.68        | 0.387/0.066                         | 0.625/0.395         | 0.265/0             |
| U3IGP4    | Aspartate beta-hydroxylase                              | 735               | 36.05        | 0.802/0.108                         | 0.991/0.608         | 1.599/0.005         |
| U3IYF3    | Voltage dependent anion channel 2                       | 294               | 59.18        | 0.337/0                             | 0.773/0.807         | 1.419/0.146         |
| U3J9A1    | WD repeat domain 1                                      | 636               | 41.35        | 0.773/0.071                         | 0.855/0.311         | 0.530/0             |

SI TABLE 1: continued

| Accession      | Name                                                                     | Protein<br>Length | %Cov<br>(95) | Fold change in expression / p-value |                     |                     |
|----------------|--------------------------------------------------------------------------|-------------------|--------------|-------------------------------------|---------------------|---------------------|
|                |                                                                          |                   |              | 12 hpi                              | 24 hpi              | 42 hpi              |
| A0A1P8L<br>K38 | 2',5'-oligoadenylate synthetase-like<br>protein                          | 503               | 48.11        | 10.568/9.63<br>E-05                 | 24.434/6.78E-<br>07 | 56.494/3.13E-<br>10 |
| R0M0V9         | Multifunctional protein ADE2                                             | 420               | 47.62        | 0.863/0.386                         | 0.718/0.126         | 0.575/0.009         |
| U3IUG2         | Plastin 3                                                                | 640               | 38.91        | 0.673/0.114                         | 0.773/0.044         | 0.347/0             |
| R0LPZ6         | Thioredoxin domain-containing<br>protein 5                               | 348               | 74.14        | 0.597/0.373                         | 0.802/0.274         | 1.660/0.013         |
| U3J8P3         | Ribosomal protein L5                                                     | 297               | 48.82        | 0.506/0.006                         | 0.780/0.364         | 0.655/0.104         |
| R0LD68         | Adenosylhomocysteinase                                                   | 433               | 43.65        | 0.497/0.011                         | 0.667/0.009         | 0.278/0             |
| U3II47         | Aldo-keto reductase family 1 member<br>A1                                | 328               | 68.60        | 0.685/0.032                         | 0.824/0.635         | 0.525/0.009         |
| U3I4Q2         | Capping actin protein of muscle<br>Z-line beta subunit<br>Tyrosine       | 272               | 66.18        | 0.608/0.035                         | 1.086/0.043         | 0.387/0.004         |
| U3I4C0         | 3-monooxygenase/tryptophan<br>5-monooxygenase activation protein<br>zeta | 247               | 72.06        | 0.310/0.128                         | 0.679/0.509         | 0.380/0.003         |
| U3IR48         | Dihydrolipoyl dehydrogenase                                              | 505               | 36.63        | 0.373/0.003                         | 0.920/0.409         | 1.419/0.139         |
| U3ISI9         | Transaldolase                                                            | 305               | 52.46        | 0.432/0                             | 0.802/0.357         | 0.302/0             |
| R0JLG5         | Calnexin                                                                 | 591               | 25.21        | 0.337/0.021                         | 0.461/0.183         | 2.291/0             |
| R0L8I2         | Prohibitin                                                               | 275               | 73.45        | 0.982/0.491                         | 0.955/0.534         | 1.690/0.009         |
| R0LYS8         | RuvB-like helicase                                                       | 409               | 43.28        | 1.028/0.798                         | 0.871/0.754         | 1.820/0.013         |
| R0M1C8         | 40S ribosomal protein S7                                                 | 201               | 61.69        | 0.229/0.002                         | 0.673/0.742         | 1.271/0.157         |
| U3IEA5         | Cortactin                                                                | 556               | 31.65        | 0.637/0.009                         | 0.991/0.928         | 0.199/0.007         |
| U3IB92         | Ribophorin II                                                            | 576               | 31.60        | 0.586/0.271                         | 0.863/0.141         | 2.070/0             |
| U3IUS7         | NSFL1 cofactor                                                           | 358               | 43.3         | 1.037/0.226                         | 1.047/0.226         | 0.099/1.94E-0<br>6  |
| U3IEZ5         | Polypyrimidine tract binding protein 1                                   | 557               | 45.24        | 0.718/0.287                         | 0.809/0.025         | 0.545/0.006         |
| P33238         | Interferon-induced GTP-binding<br>protein Mx                             | 721               | 25.38        | 2.249/0.221                         | 12.474/1.28E-<br>05 | 24.434/2.68E-<br>10 |
| P13743         | L-lactate dehydrogenase B chain                                          | 333               | 48.65        | 0.614/0.007                         | 0.711/0.002         | 0.221/0             |
| U3I4Q4         | Nucleoside diphosphate kinase                                            | 269               | 56.51        | 0.479/0.010                         | 1.047/0.623         | 0.150/1.82E-0<br>5  |
| U3I535         | Aldo-keto reductase family 1 member<br>D1                                | 326               | 56.13        | 0.946/0.695                         | 0.973/0.554         | 0.164/0             |
| U3I4P2         | SAMM50 sorting and assembly<br>machinery component                       | 466               | 33.26        | 1.660/0.039                         | 1.282/0.932         | 1.499/0.016         |
| R0LL58         | RNA-binding protein 12                                                   | 880               | 18.75        | 0.904/0.946                         | 0.649/0.036         | 1.159/0.809         |
| R0LRZ1         | Thrombospondin-1                                                         | 1148              | 15.68        | 1.180/0.219                         | 0.871/0.873         | 4.487/3.72E-0<br>7  |
| U3J9S1         | Proteasome subunit alpha type                                            | 261               | 57.47        | 0.809/0.716                         | 0.817/0.226         | 0.520/0.027         |

SI TABLE 1: continued

| Accession      | Name                                                                                           | Protein<br>Length | %Cov<br>(95) | Fold change in expression / p-value |             |              |
|----------------|------------------------------------------------------------------------------------------------|-------------------|--------------|-------------------------------------|-------------|--------------|
|                |                                                                                                |                   |              | 12 hpi                              | 24 hpi      | 42 hpi       |
| R0L8K4         | Transforming growth<br>factor-beta-induced protein<br>ig-h3                                    | 621               | 22.87        | 1.086/0.582                         | 0.718/0.180 | 3.221/0      |
| U3IZX9         | Proteasome endopeptidase<br>complex                                                            | 216               | 56.94        | 0.731/0.054                         | 0.780/0.079 | 0.316/0.006  |
| U3J840         | 60S ribosomal protein L6                                                                       | 277               | 40.43        | 0.643/0.163                         | 2.831/0.555 | 1.770/0.035  |
| R0LJH4         | Selenide, water dikinase 1                                                                     | 393               | 44.78        | 0.839/0.927                         | 0.938/0.488 | 0.466/0.020  |
| U3I004         | Chloride intracellular channel<br>protein                                                      | 253               | 51.38        | 0.608/0.047                         | 0.661/0.149 | 0.655/0.336  |
| U3IK89         | ATP synthase, H <sup>+</sup> transporting,<br>mitochondrial F1 complex,<br>gamma polypeptide 1 | 474               | 20.89        | 0.745/0.096                         | 1.236/0.924 | 1.959/0.021  |
| R0KYG8         | HEAT repeat-containing<br>protein 1                                                            | 2114              | 7.10         | 1.247/0.358                         | 1.019/0.177 | 1.905/0.014  |
| R0M006         | Alpha-aminoadipic<br>semialdehyde synthase,<br>mitochondrial                                   | 926               | 14.36        | 0.973/0.713                         | 1.770/0.007 | 1/0.359      |
| U3IFA9         | Vaccinia related kinase 1                                                                      | 413               | 28.57        | 0.973/0.843                         | 0.973/0.741 | 2.051/0.015  |
| U3IDJ5         | Reticulon                                                                                      | 1024              | 16.31        | 0.991/0.703                         | 0.603/0.121 | 2.051/0.017  |
| A0A172Q<br>NP5 | Superoxide dismutase [Cu-Zn]                                                                   | 154               | 85.06        | 0.817/0.406                         | 0.920/0.254 | 0.157/0      |
| U3J5F9         | Cytochrome c oxidase subunit<br>5A                                                             | 150               | 47.33        | 0.679/0.188                         | 0.912/0.743 | 1.675/0.019  |
| U3IDU6         | Ribosomal protein                                                                              | 214               | 37.38        | 0.247/0.008                         | 0.409/0.007 | 1.282/0.223  |
| R0JSN7         | Histone-lysine<br>N-methyltransferase                                                          | 593               | 19.73        | 0.946/0.885                         | 0.608/0.029 | 1.0186/0.346 |
| U3J173         | TSR1, ribosome maturation<br>factor                                                            | 738               | 16.4         | 1.096/0.459                         | 1.472/0.197 | 1.923/0.019  |
| R0JKW0         | Cytochrome c                                                                                   | 107               | 57.94        | 0.449/0.018                         | 0.698/0.215 | 0.156/0      |
| R0JTR9         | Proteasome subunit beta type                                                                   | 203               | 51.23        | 0.773/0.310                         | 1.067/0.291 | 0.394/0.008  |
| U3J521         | Peptidylprolyl isomerase D                                                                     | 368               | 27.72        | 0.643/0.036                         | 0.879/0.986 | 0.824/0.153  |
| U3J3N7         | ENAH, actin regulator                                                                          | 763               | 14.02        | 0.619/0.100                         | 0.802/0.664 | 0.305/0.007  |
| R0L4L6         | LIM and SH3 domain protein 1                                                                   | 221               | 32.58        | 1.107/0.416                         | 2.606/0.040 | 0.305/0.002  |
| U3IJ51         | Tubulin alpha chain                                                                            | 454               | 68.94        | 1.057/0.771                         | 2.377/0.972 | 2.729/0.017  |
| U3IYK8         | RAD23 homolog B, nucleotide<br>excision repair protein                                         | 401               | 20.45        | 0.973/0.713                         | 1.107/0.659 | 0.545/0.032  |
| U3IZ93         | Cathepsin K                                                                                    | 335               | 39.40        | 0.847/0.779                         | 0.631/0.280 | 0.229/0.005  |
| R0KYP5         | Hemoglobin subunit rho                                                                         | 147               | 50.34        | 0.2911/0.026                        | 0.145/0.007 | 1.445/0.814  |
| U3ICK7         | Phosphoserine<br>aminotransferase                                                              | 371               | 23.72        | 0.794/0.610                         | 1.191/0.811 | 0.461/0.026  |

SI TABLE 1: continued

| Accession  | Name                                                        | Protein<br>Length | %Cov<br>(95) | Fold change in expression / p-value |              |                |
|------------|-------------------------------------------------------------|-------------------|--------------|-------------------------------------|--------------|----------------|
|            |                                                             |                   |              | 12 hpi                              | 24 hpi       | 42 hpi         |
| U3IZR4     | Paxillin                                                    | 590               | 20.85        | 0.766/0.880                         | 0.794/0.242  | 0.363/0.035    |
| U3J6D5     | Caspase 3                                                   | 275               | 30.91        | 1.644/0.017                         | 1.159/0.771  | 1.271/0.491    |
| A0A0M4S8A2 | Double-stranded<br>RNA-dependent protein kinase             | 502               | 10.76        | 6.982/0.134                         | 32.810/0.002 | 25.351/0       |
| R0JMN5     | Abhydrolase<br>domain-containing protein 12                 | 336               | 19.35        | 1.803/0.026                         | 1.770/0.089  | 1.419/0.069    |
| R0JSB0     | UPF0553 protein C9orf64-like<br>protein                     | 227               | 33.04        | 1.213/0.296                         | 0.560/0.048  | 1.047/0.858    |
| R0KTZ1     | Polypeptide<br>N-acetylgalactosaminyltransferase            | 559               | 10.38        | 2.014/0.028                         | 0.832/0.165  | 1.138/0.753    |
| R0K2W7     | Glycerol-3-phosphate<br>dehydrogenase, mitochondrial        | 562               | 8.185        | 1.318/0.378                         | 1.138/0.976  | 2.208/0.029    |
| U3J3R4     | Cap methyltransferase 1                                     | 832               | 5.4          | 1.180/0.556                         | 2.128/0.084  | 3.020/0.025    |
| R0JVD4     | Bullous pemphigoid antigen 1,<br>isoforms 6/9/10            | 7442              | 1.384        | 1.028/0.877                         | 1.977/0.008  | 1.117/0.547    |
| R0KA42     | Rho GDP-dissociation inhibitor<br>1                         | 204               | 34.31        | 0.773/0.827                         | 0.839/0.519  | 0.370/0.046    |
| Q6I7L3     | MHC class I antigen                                         | 354               | 23.16        | 1.977/0.280                         | 2.992/0.105  | 5.346/0.048    |
| U3IGA8     | Transformation/transcription<br>domain associated protein   | 3819              | 2.96         | 2.99/0.006                          | 1.1169/0.882 | 3.133/0.006    |
| A0A1L5SM08 | MHC class I antigen                                         | 353               | 9.92         | 1.995/0.269                         | 5.546/0.041  | 5.012/0.017    |
| U3J6G0     | Histone H2A                                                 | 140               | 52.14        | 0.121/0.022                         | 1.644/0.198  | 0.817/0.8877   |
| R0M3Z3     | Myristoylated alanine-rich<br>C-kinase substrate            | 33                | 66.67        | 0.052/0.028                         | 0.078/0.144  | 0.550/0.656    |
| U3IZ29     | Component of oligomeric golgi<br>complex 7                  | 734               | 3.00         | 2.014/0.017                         | 0.824/0.457  | 1.169/0.579    |
| C7ELZ8     | Hemoglobin beta A subunit                                   | 147               | 36.73        | 0.166/0.033                         | 0.466/0.261  | 0.887/0.730    |
| U3J7G5     | Heme binding protein 1                                      | 178               | 14.04        | 1.057/0.812                         | 0.929/0.926  | 0.196/0.007    |
| U3IMI2     | NOC2 like nucleolar associated<br>transcriptional repressor | 684               | 3.07         | 0.631/0.007                         | 1.148/0.334  | 0.938/0.498    |
| U3I008     | Uncharacterized protein                                     | 2781              | 0.97         | 0.938/0.817                         | 0.863/0.553  | 1.644/0.021    |
| U3J7T0     | Uncharacterized protein                                     | 1877              | 34.42        | 1.086/0.699                         | 1.096/0.666  | 0.631/0.027    |
| U3IPY8     | Uncharacterized protein                                     | 1407              | 47.19        | 0.766/0.019                         | 0.938/0.027  | 0.370/0.002    |
| U3ITH8     | Uncharacterized protein                                     | 2247              | 30.22        | 0.545/0.001                         | 0.855/0.090  | 0.871/0.489    |
| U3IA67     | Uncharacterized protein                                     | 808               | 63.49        | 0.802/0.907                         | 0.887/0.127  | 0.249/1.45E-07 |
| U3IVL6     | Uncharacterized protein                                     | 500               | 60.61        | 1.570/0.583                         | 1.600/0.588  | 2.559/0.009    |
| U3IRL7     | Uncharacterized protein                                     | 471               | 42.68        | 1.706/0.213                         | 1.380/0.205  | 0.172/1.11E-05 |
| U3J9U3     | Uncharacterized protein                                     | 923               | 31.31        | 1.459/0.767                         | 0.221/0.001  | 0.036/0.002    |
| U3I6B2     | Uncharacterized protein                                     | 2224              | 8.27         | 1.191/0.174                         | 1.432/0.084  | 0.540/0.016    |

SI TABLE 1: continued

| Accession | Name                    | Protein<br>Length | %Cov<br>(95) | Fold change in expression / p-value |                 |                |
|-----------|-------------------------|-------------------|--------------|-------------------------------------|-----------------|----------------|
|           |                         |                   |              | 12 hpi                              | 24 hpi          | 42 hpi         |
| U3J090    | Uncharacterized protein | 450               | 26.44        | 1.169/0.896                         | 1.138/0.957     | 0.205/0.028    |
| U3ILL9    | Uncharacterized protein | 187               | 44.39        | 0.331/0.008                         | 0.839/0.661     | 1.247/0.511    |
| U3IUN7    | Uncharacterized protein | 385               | 28.05        | 0.483/0.077                         | 1.770/0.941     | 0.506/0.027    |
| U3I5Z1    | Uncharacterized protein | 330               | 45.76        | 1.057/0.638                         | 0.964/0.826     | 0.429/0.005    |
| U3IIX9    | Uncharacterized protein | 968               | 13.12        | 1.057/0.518                         | 1.600/0.048     | 0.780/0.412    |
| U3IWS8    | Uncharacterized protein | 924               | 27.06        | 0.705/0.360                         | 1.271/0.098     | 1.837/0.033    |
| U3I6K3    | Uncharacterized protein | 307               | 54.07        | 0.887/0.891                         | 0.724/0.381     | 0.310/0.030    |
| U3J5I9    | Uncharacterized protein | 146               | 63.70        | 0.955/0.485                         | 1.294/0.428     | 0.457/0.0227   |
| U3J0V8    | Uncharacterized protein | 580               | 21.03        | 2.109/0.111                         | 10.471/9.52E-05 | 8.710/2.22E-05 |
| U3J1Q5    | Uncharacterized protein | 227               | 63.00        | 0.802/0.463                         | 0.705/0.282     | 0.520/0.017    |
| U3ID58    | Uncharacterized protein | 208               | 55.29        | 0.824/0.383                         | 0.802/0.023     | 0.437/0.014    |
| R0LGF6    | Uncharacterized protein | 918               | 16.12        | 1.225/0.803                         | 1.330/0.235     | 1.738/0.045    |
| U3I731    | Uncharacterized protein | 1286              | 10.11        | 0.904/0.776                         | 0.946/0.634     | 0.555/0.046    |
| U3IHW2    | Uncharacterized protein | 444               | 25.23        | 0.328/0.348                         | 0.402/0.030     | 0.492/0.010    |
| U3J662    | Uncharacterized protein | 163               | 63.19        | 0.488/0.103                         | 0.780/0.165     | 0.310/0.027    |
| U3I2N1    | Uncharacterized protein | 679               | 16.64        | 0.920/0.781                         | 0.973/0.751     | 1.995/0.042    |
| R0J946    | Uncharacterized protein | 459               | 26.36        | 0.457/0.023                         | 0.592/0.217     | 0.406/0.024    |
| U3IK46    | Uncharacterized protein | 149               | 61.07        | 0.406/0.401                         | 0.247/0.014     | 0.215/0.019    |
| U3IE65    | Uncharacterized protein | 242               | 36.78        | 0.787/0.414                         | 0.780/0.683     | 0.370/0.025    |
| U3IMG4    | Uncharacterized protein | 97                | 40.21        | 0.353/0.036                         | 0.643/0.485     | 0.258/0.094    |
| U3IRS0    | Uncharacterized protein | 219               | 21.00        | 1.432/0.598                         | 0.488/0.175     | 2.128/0.046    |
| U3J3R0    | Uncharacterized protein | 655               | 58.63        | 1.096/0.513                         | 1.159/0.306     | 1.959/0.003    |
| U3J2L5    | Uncharacterized protein | 1072              | 37.69        | 0.840/0.727                         | 0.603/0.002     | 0.540/0.033    |
| U3I806    | Uncharacterized protein | 760               | 49.47        | 0.643/0.207                         | 0.920/0.357     | 1.528/0.001    |
| U3I8U0    | Uncharacterized protein | 543               | 47.15        | 1.202/0.762                         | 1.419/0.612     | 1.570/0.023    |
| U3IM27    | Uncharacterized protein | 521               | 50.48        | 0.982/0.734                         | 1.368/0.490     | 2.051/1.94E-05 |
| U3ILW3    | Uncharacterized protein | 916               | 33.08        | 1.067/0.593                         | 0.991/0.582     | 0.530/0.010    |
| U3IQA4    | Uncharacterized protein | 264               | 57.95        | 0.832/0.379                         | 1.644/0.856     | 3.221/0.001    |
| U3IR89    | Uncharacterized protein | 402               | 47.26        | 0.855/0.524                         | 0.855/0.137     | 0.497/0        |
| U3I6S1    | Uncharacterized protein | 474               | 49.37        | 0.955/0.737                         | 1.393/0.558     | 1.871/0.010    |
| U3J947    | Uncharacterized protein | 673               | 24.37        | 0.904/0.718                         | 0.912/0.140     | 0.511/0        |
| U3J8E6    | Uncharacterized protein | 277               | 72.92        | 0.718/0.355                         | 0.946/0.761     | 0.437/0.021    |
| U3IP12    | Uncharacterized protein | 1158              | 22.37        | 1.138/0.392                         | 1.282/0.209     | 0.549/0.001    |
| U3IZV9    | Uncharacterized protein | 282               | 27.3         | 0.863/0.407                         | 1.629/0.244     | 2.312/0.013    |
| U3INB7    | Uncharacterized protein | 85                | 38.82        | 0.081/0.005                         | 7.311/0.905     | 0.631/0.355    |
| R0JE94    | Uncharacterized protein | 106               | 48.11        | 0.982/0.003                         | 11.376/0.022    | 23.768/0.023   |

\*Note: % Cov (95) means percent coverage (95%). Proteins with fold change >1.5 or <0.67 and a p-value <0.05 were considered as significantly different expressions.
